1 Active case finding using mobile vans equipped with artificial intelligence aided  
2 radiology tests and sputum collection for rapid diagnostic tests to reduce  
3 tuberculosis prevalence in rural China: protocol for a pragmatic trial

4  
5 Xiaolin Wei<sup>1¶\*</sup>, Dabin Liang<sup>2¶</sup>, Zhitong Zhang<sup>1</sup>, Kevin Thorpe<sup>1</sup>, Lingyun Zhou<sup>2</sup>,  
6 Jinming Zhao<sup>2</sup>, Huifang Qin<sup>2</sup>, Xiaoyan Liang<sup>2</sup>, Zhezhe Cui<sup>2</sup>, Yan Huang<sup>2</sup>,  
7 Liwen Huang<sup>2</sup>, Mei Lin<sup>2\*</sup>

8  
9 <sup>1</sup> Dalla Lana School of Public Health, University of Toronto, Toronto, ON,  
10 Canada

11 <sup>2</sup> Guangxi Zhuang Autonomous Region Center for Disease Control and  
12 Prevention; Guangxi Key Laboratory of Major Infectious Disease Prevention  
13 and Control and Biosafety Emergency Response, Nanning, Guangxi Zhuang  
14 Autonomous Region, China

15  
16 \* Corresponding author

17 Email: [xiaolin.wei@utoronto.ca](mailto:xiaolin.wei@utoronto.ca) (XW) and [gmlinmei@126.com](mailto:gmlinmei@126.com) (ML)

18  
19 ¶ These authors contributed equally to this work.

20  
21  
22 **NOTE: This preprint reports new research that has not been certified by peer review and should not be used to guide clinical practice.**

## 23 **Abstract**

24

### 25 **Background**

26 Tuberculosis (TB) remains a significant public health challenge, particularly in  
27 rural areas of high-burden countries like China. Active case finding (ACF) and  
28 timely treatment has been proved effective in reducing TB prevalence but it is  
29 still unknown regarding the impact on TB epidemic when employing new  
30 technologies in ACF. This study aims to evaluate the effectiveness of a  
31 comprehensive ACF package utilizing mobile vans equipped with artificial  
32 intelligence (AI)-aided radiology, and GeneXpert testing in reducing TB  
33 prevalence among high-risk populations in rural Guangxi, China.

34

### 35 **Methods**

36 A pragmatic cluster randomized controlled trial will be conducted in two  
37 counties of Guangxi, China. The trial will randomize 23 townships to  
38 intervention or control groups at 1:1 ratio. The intervention group will receive a  
39 single ACF campaign in Year 1, incorporating mobile vans, AI-based DR  
40 screening, symptom assessment, and sputum collection for GeneXpert testing.  
41 Control group participants will receive usual care. TB patients identified in Year  
42 1 will be required to complete TB treatment in Year 2. The primary outcome is  
43 the prevalence rate of bacteriologically confirmed TB among high-risk

44 populations in Year 3. Process evaluation will explore adaption, acceptability  
45 and feasibility of the intervention. We will conduct incremental costing study to  
46 inform future scale-up of the intervention in other settings.

47

## 48 **Discussion**

49 This study will provide valuable insights into the effectiveness and feasibility of  
50 utilizing AI, mobile vans and GeneXpert for TB ACF to reduce TB prevalence  
51 in rural settings. If successful, this model will contribute to possible solutions to  
52 achieve the WHO End TB Strategy by 2035.

53

54 **Trial registration:** ClinicalTrials.gov Identifier -NCT06702774

55

56 **Keywords:** Tuberculosis, active case finding, mobile van, artificial intelligence,  
57 cluster randomized controlled trial, China

58

59

60

61

62

## 63 **Introduction**

64

65 The United Nations passed the Resolution to end tuberculosis (TB) by 2035. TB  
66 is the leading cause of death in infectious disease. In 2022, the world reported  
67 7.5 million new TB cases and 1.3 million deaths caused by TB [1]. TB  
68 incidence has declined by 2% a year between 2010 and 2020. However, the rate  
69 has reverted to increase by 3.9% between 2020 and 2022 due to the COVID-19  
70 pandemic [1]. To reach the END-TB resolution, global TB incidence has to be  
71 reduced to less than 100 per million by 2035 [2]. The world is looking for  
72 evidence of innovative approaches to eliminate TB in a relatively short time  
73 frame [3].

74

75 The principle of “prevent, search, detect, treat” that has successfully reduced TB  
76 prevalence in high-income countries in the last century [4]. Studies in high TB  
77 burden countries also proved that active case finding (ACF) at the community  
78 level would identify patients who are in their early stage of disease  
79 development, or who may be delayed or missed in the routine passive case  
80 finding at health facilities [4, 5]. A 2009 study in rural Zimbabwe showed both  
81 mobile van and household-to-household sputum collection methods lowered TB  
82 prevalence by 41% in three years, showing the potential of using mobile vans in  
83 case finding [6]. Another study in rural Vietnam demonstrated that conducting

84 annual community screening based on a rapid molecular diagnostic tool  
85 (GeneXpert) for three years could reduce 40% of TB prevalence in a high TB  
86 burden setting [7]. However, GeneXpert costs around US\$15 per test, which is  
87 prohibitive to be used as a large-scale screening tool.

88

89 More cost-effective active case-finding tools, such as computer-aided diagnostic  
90 tools using artificial intelligence (AI) deep learning neural networks, have  
91 shown satisfying sensitivity (86%) as a screening tool to reduce 66% of cases  
92 needed for laboratory tests [8]. Operational studies revealed the feasibility and  
93 effectiveness of using AI-facilitated X-ray and GeneXpert for community  
94 screening and diagnosis [9]; however, most studies were pre-after comparisons  
95 that were not properly designed to evaluate epidemiological impacts [10]. In  
96 addition, two studies in Africa highlighted that the interventions were more  
97 cost-effective when screening elders, close contacts with active TB patients, and  
98 individuals with comorbidities such as diabetes and HIV [11, 12].

99

100 Here, we aim to implement and evaluate the feasibility and effectiveness of a  
101 comprehensive intervention package in rural Guangxi, China, a high TB  
102 prevalent setting, that employs the latest technologies for active case finding to  
103 reduce TB epidemics among high-risk populations. The technologies include  
104 employing a mobile van equipped with AI aided radiology screening and  
105 GeneXpert test for community active case finding in communities. Our study is

106 designed as a pragmatic clustered randomized controlled trial to evaluate the  
107 effectiveness of the comprehensive package in reducing TB prevalence over a  
108 period of three years among high-risk populations.

109

## 110 **Methods**

111

112 This protocol is reported according to the Standard Protocol Items:  
113 Recommendations for Interventional Trials (SPIRIT) guidelines (see S1 Table).

114

### 115 **Study status and timeline**

116 The lifespan of this study will be 42 months in total, including 36 months for  
117 the main trial (Year 1-3). More details of trial timeline are included in the Fig 1.  
118 The trial has been started since Nov 2021 and has been suspended for 3 months  
119 due to COVID-19 control in Year 1, thus the progress was postponed  
120 accordingly. Participant recruitment and data collection has been ongoing by the  
121 time of submission of this protocol, which are estimated to be completed by end  
122 of January 2025. The trial results will be disseminated through research articles  
123 and policy briefs after the trial evaluation is completed after April 2025. We aim  
124 to publish our results and findings in leading international medical journals and  
125 present at national and international conferences.

126 **Fig 1. SPIRIT schedule of enrolment.**

127

## 128 **Study design and setting**

129 We will conduct a parallel two-group, cluster randomized controlled trial of a  
130 comprehensive package of active case finding followed by timely treatment in  
131 rural Guangxi China to evaluate whether the interventions could reduce the TB  
132 epidemic compared to the usual care (Fig 2). Guangxi is located in southwest  
133 China bordering with Vietnam. Guangxi reported 31,913 TB cases with  
134 notification rate of 70/100,000 in 2020, representing the second highest TB  
135 burden in China. Of the reported TB cases, 74% were from rural areas, and 30%  
136 were elderly ( $\geq 65$  years old). Mountainous areas in Guangxi had high TB  
137 notification rates; for example, the two trial counties (Xincheng and Xiangzhou  
138 of Laibin Prefecture) reported an average notification rate of 134/100,000,  
139 which is two times the provincial average. In addition, the Covid-19 pandemic  
140 has substantially delayed TB diagnosis and treatment, which would fuel up TB  
141 transmission and exacerbate TB epidemic.

### 142 **Fig 2. Trial design flow chart.**

143

144 TB services in China is funded and delivered by the public health system at the  
145 county, township and village levels. The TB free treatment policy requires basic  
146 TB diagnosis tests and treatment should be free (for drug susceptible cases) or  
147 supported by the health insurance schemes (for drug resistant cases). The  
148 County Centre for Disease Control (CDC) is responsible for TB planning,

149 reporting and quality control, while TB clinical care is provided by the TB  
150 Clinic at the County Hospital. Passive case finding is the practice of usual care,  
151 where patients with chronic cough or other TB-related symptoms are self-  
152 presented or referred to the County Hospital for subsequent diagnosis and  
153 treatment. TB diagnosis is based on sputum smear, chest X-ray examinations,  
154 and clinical assessments. Standard WHO DOTS treatment regimen is provided  
155 for patients diagnosed of drug-susceptible TB. TB patients visit the County  
156 Hospital monthly for medication renewals. Patients take their anti-TB  
157 medications on a daily basis with the support of village doctors, who are  
158 community health workers. In Guangxi, village doctors are semi-private who  
159 receive 50% of income from the township hospitals for their public health work  
160 such as maternal and child health, immunization, pap smear screening, and  
161 disease management including TB, diabetes, and hypertension, while they earn  
162 the other 50% income from clinical consultations under the rural health  
163 insurance scheme. According to the National TB Guideline, village doctors are  
164 responsible to visit TB patients weekly. The public health doctor in the  
165 township hospital is required to supervise village doctors and visit patients  
166 monthly. However, the actual frequency is far less and often substituted via  
167 phone calls. In each village, there is a female social worker in the Village  
168 Committee, who plays a major role in public education, maternal and child care,  
169 and protecting women's rights. These female social workers have a strong  
170 connection with villagers but have not been involved in TB care.



171

## 172 **Eligibility criteria**

### 173 **Clusters**

174 We have two levels of clustering in this trial. Township is treated as the cluster  
175 of intervention. A township is an administrative unit with a township hospital  
176 and consists of 7-12 villages. All townships in Xincheng and Xiangzhou county,  
177 which provide their willingness to participate, will be included. Villages within  
178 the participating township serve as sub-cluster in the survey that determines the  
179 TB prevalence rate.

180

### 181 **Participants**

182 In each township, all residents who are 15 or older become eligible and defined  
183 as high-risk populations if they: 1) are elderly (i.e., aged 65 and above), or 2)  
184 been aged below 65 but with one of the following conditions: being patients  
185 previously treated for TB or close contacts of a patient with a TB patient  
186 diagnosed within the last three years; having been clinically diagnosed with  
187 diabetes, HIV positive, or worked as a miner. All eligible participants who  
188 signed informed consent form will be recruited to the study. Residents who  
189 refuse participation will be excluded.

190

### 191 **Procedures**

## 192 **TB Care provided in both groups**

193 Routine TB care is provided per the China National TB Guideline to both  
194 groups, where passive case finding is practiced. Patients self-present or are  
195 referred to the TB clinic at the County Hospital when they seek care for TB  
196 related symptoms. TB diagnosis is based on X-ray examination, sputum smears  
197 and clinical assessment. Confirmed TB patients are treated in County Hospitals  
198 based on the WHO DOTS regimens for drug-sensitive TB. Those who are  
199 diagnosed with multi-drug resistant (MDR) TB are referred to prefecture TB  
200 designated hospital.

201

## 202 **Usual care**

203 Usual care will be provided in the control group, and no active case finding  
204 activities will be provided.

205

## 206 **Intervention**

207 In the intervention group, in addition to usual care, we will implement one  
208 active case-finding campaign among all eligible participants in Year 1 (Fig 3).  
209 Villagers will be informed of the screening through public information and  
210 social workers. Prior to the visit, village social workers and village doctors will  
211 conduct door-to-door visits to recruit participants and obtain their informed  
212 consent. We will employ a mobile van equipped with the AI-facilitated digital  
213 radiography (DR) machine and refrigerator to visit villages on a mutually

214 agreed date. On the day, all eligible participants will be invited to complete a  
215 brief questionnaire regarding TB related symptoms, and then invited to have  
216 their DR examined in the van. Those who are presumptive of TB based on  
217 either DR examination or any TB related symptoms, including any chronic  
218 cough over two weeks, hemoptysis, fever, night sweats, chest pain or  
219 unexplained weight loss, will be asked to produce a single on-site sputum.  
220 These villagers are also asked to take two specimen boxes for collection of  
221 night and morning sputum. All staff are trained for good quality sputum sample  
222 collection, storage and transportation. Medical nebulizer inhalation will be  
223 provided to those who can not provide good quality sputum. Sputum samples,  
224 either collected on the day or delivered by village doctors within 48 hours, will  
225 be stored in the refrigerator of the mobile van and transported to the county  
226 hospitals at daily basis for sputum smear, culture and GeneXpert using sample  
227 mixed approach which method of mixing is published elsewhere [13].  
228 Participants who are bacteriologically negative but have abnormal DR result or  
229 TB symptoms will be referred to the county hospital for clinical assessment  
230 based on China National TB guideline. All diagnosed TB patients, either  
231 bacteriologically or clinically confirmed, will be notified by the village doctor  
232 within 48 hours and referred to the County Hospital for standard WHO DOTS  
233 regimens per national guideline.

234 **Fig 3. Algorithm of active TB case finding in intervention group.**

235 a. TB symptoms include chronic cough over 2 weeks, hemoptysis, fever, night  
236 sweats, chest pain or unexplained weight loss.

237 TB= tuberculosis, DR= digital radiography

238

### 239 **Research activities apply to both groups:**

240 We will wait for a year (cleaning period) to ensure all TB patients identified in  
241 Year 1 complete the treatment. We will conduct epidemiological prevalence  
242 survey in both groups in Year 3 using cluster-random sampling methods  
243 adopted from WHO [14], targeting high-risk populations in both intervention  
244 and control groups, to compare the TB prevalence rates. Regarding the survey,  
245 we will apply the same active case finding activities as outlined above to both  
246 intervention and control groups. For feasibility reasons, we plan to conduct the  
247 survey in Year 3 at the village (sub-cluster) levels in both groups.

248

### 249 **Outcomes**

250 Our primary outcome indicator is the prevalence rate of bacteriologically  
251 positive TB in Year 3 among the high-risk populations, including those 65 and  
252 older, those who are under 65 but have a history of tuberculosis treatment or  
253 have been in close contact with a person diagnosed with TB within the past  
254 three years, have been clinically diagnosed with diabetes, HIV, or have a  
255 background of working as a miner. According to WHO definitions,  
256 bacteriologically positive case is defined as having a positive test from any of

257 the three tests (i.e., GeneXpert, smear or culture). Prevalence is estimated using  
258 a cluster-random survey among the high-risk populations that is conducted in  
259 both the intervention and control groups in Year 3.

260

261 There is a list of secondary outcome indicators, which allow us to assess and  
262 evaluate whether our interventions could bring positive impacts on TB epidemic  
263 in the intervention and control groups: 1) prevalence rate of active TB,  
264 including both bacteriologically positive and negative cases, among the high-  
265 risk populations in Year 3. This indicator will also rely on estimates from the  
266 epidemiological survey in Year 3; 2) notification rates of bacteriologically  
267 positive TB cases among all populations in Year 3; and 3) notification rates of  
268 active TB cases, including both bacteriologically positive and negative cases  
269 among all populations in Year 3. Nominators of the two notification rates will  
270 include TB cases identified from our epidemiological survey in Year 3 plus TB  
271 cases reported from the National TB Program, while both denominators include  
272 all adult residents (i.e., those of 15 years and older) in the intervention and  
273 control groups.

274

275 We will also collect costs from patient, health system and societal perspectives  
276 to conduct an incremental costing study. We will collect process indicators that  
277 will including a) the proportion of bacteriologically positive cases identified by  
278 active case finding in the intervention group; b) the yield rate of our

279 intervention, which is the number of bacteriologically positive cases per 100  
280 persons screened using each strategy.

281

## 282 **Sample size**

283 The sample size is calculated for the investigation of the primary outcome, i.e.,  
284 the prevalence rate of bacteriologically confirmed TB, that will be conducted in  
285 Year 3. We estimated that the TB prevalence rate among the high-risk  
286 populations in the trial area is about 300 per 100,000. We assume our  
287 intervention will reduce the rate among the high-risk populations in the  
288 intervention group by 50% (i.e., to 150 per 100,000) within 24 months, which  
289 can be considered as a significant reduction at the population level. We estimate  
290 that the intra-class correlation coefficient for TB prevalence was 0.001 [7]. The  
291 average number of eligible participants is about 500 per village based on the  
292 initial reports. We estimate that we would need 47 villages (that is,  
293 approximately 23,500 participants) in each group to have 80% power to detect  
294 the reduction estimated above, assuming  $p < 0.05$ .

295

## 296 **Recruitment, randomization and blinding**

297 There are 23 townships and 255 villages in Xincheng and Xiangzhou county of  
298 Laibin city [15]. We will implement the active case finding intervention at the  
299 township level to avoid contamination because township hospitals manage

300 village doctors. We seek to recruit all willing townships. After recruitment, the  
301 study statistician will use a custom-written computer program to randomize all  
302 recruited townships, stratified by county, assigning them to the control and  
303 intervention group in an overall 1:1 ratio (12 intervention vs 11 control) [16].  
304 Then township/village doctors and county hospital staff in the intervention  
305 group will be invited to receive training about specific interventions in this  
306 project. For the epidemiological survey in Year 3, the statistician will randomly  
307 select 47 villages (sub-clusters) from each group stratified by county. We will  
308 seek written informed consent from each participant before enrollment, as we  
309 need to collect their health information, bio-sample (sputum) and test result for  
310 research purpose.

311

312 Due to the nature of the intervention, neither single nor double blindness  
313 procedure is applicable. However, we will blind the data analysts who process  
314 the end-point data for outcome assessment.

315

## 316 **Data collection**

317 We will collect all types of field data produced during the trial, including  
318 patients' basic information, disease history, health information, DR test result,  
319 laboratory test result for TB and diagnosis, as well as routine TB reporting data.  
320 All data will be entered into a data website designed for this project, accessible  
321 only by designated researchers via local intranet with a password. Individual

322 data will be deidentified and stored for five years after the completion of the  
323 trial. For research purpose, we will define all outcomes at the subcluster-level  
324 and will calculate them from the individual-level data as single summary  
325 outcome values, such as prevalence per cluster.

326

### 327 **Active screening**

328 During the active case screening, we will collect the information about  
329 suspicious symptoms, including chronic cough for more than 2 weeks,  
330 hemoptysis, blood sputum, fever, night sweats, chest pain or unexplained  
331 weight loss, and TB risk factors (close contact history of tuberculosis patients,  
332 diabetes, AIDS/HIV and dust exposure).

333

### 334 **Laboratory testing and clinical consultation**

335 The county hospitals will carry out laboratory testing according to the ‘TB  
336 Laboratory Testing Protocol’. Sputum smear test, GeneXpert test and sputum  
337 culture are carried out at the same time. Every five samples of sputum are mixed  
338 for GeneXpert test to save costs. Those positive mixed sample will be tested  
339 separately to confirm the positive case. County hospitals will distribute the  
340 laboratory testing results to patients within 48 hours. All TB diagnoses will be  
341 recorded in the ‘Register of Newly Diagnosed Patients’ (labelled with subject  
342 number) in detail. Clinical diagnosis based on the clinical assessment is  
343 performed by doctors in county hospitals according to the national TB



344 Classification Criteria (WS196-2017) and Diagnostic Criteria (WS288-2017)  
345 [17, 18]. We will also collect TB cases diagnosed through the usual care in both  
346 intervention and control groups through the three years.

347

### 348 **Primary and secondary outcomes**

349 The data collection approach in Year 3 for the outcome evaluation will be the  
350 same as the active TB case finding in the intervention group in Year 1. As we  
351 define most of our outcomes as single summary values at the subcluster-level,  
352 such as prevalence and incidence, we will sample from both intervention and  
353 control group, calculate and compare the outcomes following the trial period.  
354 Take the primary outcome, the prevalence of bacteriologically positive TB, for  
355 instance, we will sample all high-risk populations of selected villages (sub-  
356 clusters) of the two groups, conduct a sputum smear, GeneXpert, sputum culture  
357 test, and compare the calculated prevalence of bacteriologically positive TB. A  
358 similar process also applies to measure secondary outcomes, such as prevalence  
359 of active TB in two groups.

360

### 361 **Statistical analysis**

362 The results of this project will be reported according to the ‘Consolidated  
363 Standards of Reporting Trials: Extension for Cluster Trials’ (CONSORT)  
364 guidelines [19]. We will create a detailed statistical analysis plan. In the full  
365 research paper, we will present appropriate descriptive statistics for the two

366 counties and all relevant participants before and during the trial. In addition,  
367 using cluster-level methods of analysis, we can get a main set of estimates for  
368 our primary and secondary outcomes after the trial, acting as the primary  
369 evidence for determining the effectiveness of this trial. Appropriate summary  
370 statistics and their associated 95% confidence interval for all differences  
371 outcomes between the intervention group and the control group will be  
372 calculated. No interim analyses are involved in this project.

373

374 For the primary outcome and all secondary proportion-based outcomes, the  
375 statistical analysis will employ a mixed-effect logistic regression model  
376 including random effects for township and village. The intervention effect will  
377 be expressed as an odds ratio with 95% confidence intervals. Secondary  
378 analyses of these outcomes will adjust for the following variables: age, sex, and  
379 ethnicity.

380

381 For continuous secondary outcomes we will employ a linear mixed-effect model  
382 with random effects for township and village. This model will also adjust for the  
383 following variables: age, sex, and ethnicity. The intervention effect will be  
384 expressed as the adjusted mean difference with 95% confidence intervals.

385

386 **Process evaluation**

387 Since our project contains multiple components, the process evaluation during  
388 and after the trial is guided by the framework for design and evaluation of  
389 complex interventions [20, 21]. Utilizing a combination of qualitative and  
390 quantitative methods, process evaluation for the complex interventions in our  
391 cRCT can explore the mechanism of achieving the intervention effects [22]. In  
392 other words, we can get insights of a series questions such as ‘what  
393 interventions are effective in which policies and implementation environments,  
394 for whom and why?’. We will conduct around 30 in-depth semi-structured  
395 interviews with leading personnel at all levels of health agencies, township and  
396 village doctors, county hospital staffs, social workers, and trial participants in  
397 the intervention group.

398

399 Our specific objectives for the process evaluation include: 1) to determine  
400 intervention accessibility by the number of subjects receiving screening,  
401 presented to county hospitals, and under treatment, as well as their feedbacks; 2)  
402 to explore the intervention effectiveness (reasons for both effectiveness and  
403 ineffectiveness), along with the relationship between interventions and expected  
404 results; 3) to access the acceptance of intervention implementation at the  
405 organization level and the staff level – any conflicts with existing management  
406 or policies, and corresponding adjustment; 4) to report intervention fidelity, the  
407 degree and quality of intervention completion, as well as challenges and  
408 unexpected results, at both subcluster-level and individual level.

409

### 410 **Analysis of process evaluation**

411 All the recorded interviews will be transcribed and translated into English  
412 before qualitative analysis. We will use NVivo 10 software to process and  
413 analyze our qualitative data guided by a framework analysis as described by  
414 Gale et al [23], to identify themes related to our process evaluation objectives.  
415 The findings will be reported based on the Consolidated Criteria for Reporting  
416 Qualitative Research (COREQ) guidelines [24].

417

### 418 **Costing study**

419 This study will measure the incremental cost-effectiveness of interventions  
420 compared with conventional TB finding, using research data and literature to  
421 evaluate both health system and social benefits. We will compare direct costs  
422 and outcomes of the intervention group to those of the control group throughout  
423 the 24-month trial. The objective of the costing study is to calculate the  
424 incremental cost-effectiveness ratio (the increased costs required for each 1%  
425 reduction in the prevalence of active TB among high-risk populations) using  
426 data from the project's primary outcome.

427

### 428 **Data collection**

429 We will send out a questionnaire to directors of all recruited township or village  
430 hospitals to collect health care resources used in the trial, along with their costs.

431 The data include: 1) average salaries, in RMB, for each level of staff in  
432 designed hospitals who participated in this project; 2) average salaries, in RMB,  
433 for township and village doctors who do not work in designated hospitals but  
434 still participated in the project; 3) average salaries, in RMB, for social workers  
435 and other personnel worked in the project implementation; 4) the duration of  
436 consultations on mobile health vehicle and in county hospital); 5) the frequency  
437 and duration of staff training and sequential meetings during the process; 7) cost  
438 for TB screening (i.e. symptom screening, chest DR, mobile van operation,  
439 sending samples to county hospitals) and laboratory test (e.g. sputum smear,  
440 culture, and GeneXpert). To optimize the data quality, we will double-entry and  
441 random-check the input data.

442

#### 443 **Estimation of resources use and costs**

444 Healthcare resources in this case include resources used for TB detection and  
445 diagnosis. The cost per patient is calculated as the sum of consultation,  
446 screening and laboratory testing. The total costs is calculated for the main  
447 analysis population as described in the Statistical Analysis section [25].

448

#### 449 **Estimation of implementation costs**

450 The implementation costs are calculated separately and will not be accounted in  
451 the cost-effectiveness analysis. The objective of this estimation is to inform  
452 policy makers and stakeholder of the potential cost to facilitate their decision on

453 whether to implement the intervention at scale. For each cluster, the  
454 implementation costs included the cost of training for personnel, the cost of  
455 personnel to attend training, the costs for developing and printing the handbook  
456 or guidelines per training attendee, operation cost of mobile van, driver cost,  
457 setup cost of AI facilitated DR, the costs for producing symptom questionnaires  
458 used in the project, and the costs of sending samples back to county hospitals.

459

## 460 **Trial management**

461 Guangxi CDC will lead this project and have full access to all the anonymized  
462 data and information associated with the trial. We will establish a data  
463 monitoring committee (DMC) to ensure all data are collected in conformity  
464 with the agreed ethical guidelines, stored in Guangxi CDC properly and used  
465 for research purposes only. Meanwhile, the DMC is also responsible for the  
466 safety and privacy protection of all the subjects and providers participated in the  
467 trial. Additionally, there will be a trial steering committee (TSC) lead by  
468 external members to generate the progress of the trial. We will hold regular  
469 online meetings with both DMC and TSC every 6 months to get updates and  
470 discuss any protocol modifications, starting from the beginning of the study,  
471 until it completes. If there are any changes or concerns needed to report or  
472 discuss, the committees can meet on an ad hoc basis with the co-leaders as well.  
473 Moreover, a trial management unit (TMU) will be established in consisting of

474 three local staff. The responsibility of the TMU is to better manage the day-to-  
475 day activities of the trial according to the study protocol.

476

## 477 **Discussion**

478 This study aims to enhance the existing TB control protocol in an area of high  
479 TB prevalence. As the location of implementation, Laibin is an ethnically  
480 diverse area with the highest reported TB incidence rate in Guangxi region. In  
481 other words, it has an urgent need to find a more effective way to manage its TB  
482 epidemic. Given that about 27% of all reposted cases in Guangxi region are  
483 from the elderly population, the interventions target the elderly and also pay  
484 special attention to other populations who have high risk of TB infection [15,  
485 26, 27].

486

487 The study has significant policy relevance to China and globally. The objective  
488 of this study is to effectively reduce the TB epidemic in Guangxi and achieve  
489 the WHO's End TB Strategy [2] milestones by 2024. If successful, the  
490 prevalence of TB in the intervention areas will be reduced by more than 50%. It  
491 aligns with the goal to build a healthy China as well. The successful  
492 implementation of this study will yield a feasible TB control strategy that can be  
493 replicated in other parts of China, which may provide a model for countries with  
494 similar context to achieve to the WHO's goal to end TB by 2035 [2].

495

496 Furthermore, active screening interventions involve innovative technologies.

497 Since over 40% of areas in Laibin are mountainous, the mobile health vehicles

498 equipped with DR machines and refrigerators make active screening procedures

499 more convenient, and all the bio-samples can be properly stored and timely

500 transported to the county hospital. In addition, the AI-based diagnostic system

501 (above 90% sensitivity) offers axillary support to detect abnormalities in DR

502 images, increasing the test efficacy [28].

503

504 Nevertheless, there are some limitations in this study as well. First, TB-

505 suspected participants in the active screening intervention are required to collect

506 two sputum samples (one for morning and one for night sputum) and send them

507 to village doctors. Although specific equipment and instructions will be given,

508 there are still risks of improper sample collection or transportation, which may

509 affect laboratory results and TB diagnosis. We provide training for people

510 assumptive of TB in sputum collection to improve the quality. Secondly, due to

511 the limitation of funding and human resources, we are not able to conduct active

512 case finding among all populations in participating townships in Year 3.

513 Therefore, the trial cannot evaluate the impact of interventions on TB

514 prevalence in the general population. On the other side, a survey of the

515 population may not be feasible anyway because most people of working ages in

516 rural areas moved to urban areas as migrants during most time of the year, while



517 only elders, who comprise the majority of our high-risk population, and children  
518 stay at home. Our active case-finding activity targeting high-risk populations  
519 would significantly reduce TB in rural areas.

520

## 521 **List of abbreviations**

522 AI: Artificial Intelligence

523 AIDS: Acquired Immunodeficiency Syndrome

524 CDC: Center for Disease Prevention and Control

525 DMC: Data Monitoring Committee

526 DR: Digital Radiography

527 HIV: Human immunodeficiency Virus

528 MDR-TB: Multidrug-resistant Tuberculosis

529 NTP: National TB Program

530 RCT/cRCT: Randomised Controlled Trial/Cluster Randomised Controlled Trial

531 TB: Tuberculosis

532 TCS: Trial Steering Committee

533 TMU: Trial Management Unit

534 WHO: World Health Organization

535

## 536 **Acknowledgement**

537 We acknowledge Guangxi Laibin Prefectural Center for Disease Control and  
538 Prevention, Xincheng and Xiangzhou County Centers for Disease Control and  
539 Prevention as well as all the health providers and patients who participate in  
540 discussions to develop the proposal.

541

## 542 **Data sharing statement**

543 Metadata won't be publicly available due to local policy. Clustered data can be  
544 shared by email (Guangxi CDC, lxy530028@163.com) based on reasonable  
545 request for research purpose only upon approval after January 1, 2027.

546

## 547 **Competing interests statement**

548 The authors declared no competing interests.

549

## 550 **Ethical approvals and consent to participate**

551 The study has obtained ethical approval from the Guangxi Institutional Review  
552 Board of the Guangxi CDC on 26 August 2021 (Ref: GXIRB2021-0033).  
553 Written informed consent form will be collected before any patient is recruited  
554 into the study.

555

## 556 **Reference**

- 557 1. WHO. Global tuberculosis report 2023. Geneva: the World Health Organization,,  
558 2023.
- 559 2. World Health Organization [WHO]. The End TB Strategy 2015 [cited 2022 Feb. 19];  
560 2022(Feb. 19). Available from: [https://www.who.int/teams/global-tuberculosis-](https://www.who.int/teams/global-tuberculosis-programme/the-end-tb-strategy)  
561 [programme/the-end-tb-strategy](https://www.who.int/teams/global-tuberculosis-programme/the-end-tb-strategy).
- 562 3. Lönnroth K, Castro KG, Chakaya JM, Chauhan LS, Floyd K, Glaziou P, et al.  
563 Tuberculosis control and elimination 2010–50: cure, care, and social development. The  
564 Lancet. 2010;375(9728):1814-29. doi: [https://doi.org/10.1016/S0140-6736\(10\)60483-7](https://doi.org/10.1016/S0140-6736(10)60483-7).
- 565 4. WHO. Systematic screening for active tuberculosis: Principles and  
566 Recommendations. Geneva: World Health Organization; 2013.
- 567 5. Kranzer K, Afnan-Holmes H, Tomlin K, Golub JE, Shapiro AE, Schaap A, et al. The  
568 benefits to communities and individuals of screening for active tuberculosis disease: a  
569 systematic review. Int J Tuberc Lung Dis. 2013;17(4):432-46. Epub 2013/03/15. doi:  
570 10.5588/ijtld.12.0743. PubMed PMID: 23485377.
- 571 6. Corbett EL, Bandason T, Duong T, Dauya E, Makamure B, Churchyard GJ, et al.  
572 Comparison of two active case-finding strategies for community-based diagnosis of  
573 symptomatic smear-positive tuberculosis and control of infectious tuberculosis in Harare,  
574 Zimbabwe (DETECTB): a cluster-randomised trial. Lancet. 2010;376(9748):1244-53. Epub  
575 2010/10/07. doi: 10.1016/s0140-6736(10)61425-0. PubMed PMID: 20923715; PubMed  
576 Central PMCID: PMC2956882.
- 577 7. Marks GB, Nguyen NV, Nguyen PTB, Nguyen TA, Nguyen HB, Tran KH, et al.  
578 Community-wide Screening for Tuberculosis in a High-Prevalence Setting. N Engl J Med.  
579 2019;381(14):1347-57. Epub 2019/10/03. doi: 10.1056/NEJMoa1902129. PubMed PMID:  
580 31577876.

- 581 8. Qin ZZ, Sander MS, Rai B, Titahong CN, Sudrungrot S, Laah SN, et al. Using artificial  
582 intelligence to read chest radiographs for tuberculosis detection: A multi-site evaluation of  
583 the diagnostic accuracy of three deep learning systems. *Sci Rep.* 2019;9(1):15000. Epub  
584 2019/10/20. doi: 10.1038/s41598-019-51503-3. PubMed PMID: 31628424; PubMed Central  
585 PMCID: PMCPMC6802077.
- 586 9. Zaidi SMA, Habib SS, Van Ginneken B, Ferrand RA, Creswell J, Khowaja S, et al.  
587 Evaluation of the diagnostic accuracy of Computer-Aided Detection of tuberculosis on Chest  
588 radiography among private sector patients in Pakistan. *Sci Rep.* 2018;8(1):12339. Epub  
589 2018/08/19. doi: 10.1038/s41598-018-30810-1. PubMed PMID: 30120345; PubMed Central  
590 PMCID: PMCPMC6098114.
- 591 10. Pande T, Cohen C, Pai M, Ahmad Khan F. Computer-aided detection of pulmonary  
592 tuberculosis on digital chest radiographs: a systematic review. *Int J Tuberc Lung Dis.*  
593 2016;20(9):1226-30. Epub 2016/08/12. doi: 10.5588/ijtld.15.0926. PubMed PMID:  
594 27510250.
- 595 11. Kranzer K, Lawn SD, Meyer-Rath G, Vassall A, Radithalo E, Govindasamy D, et al.  
596 Feasibility, Yield, and Cost of Active Tuberculosis Case Finding Linked to a Mobile HIV Service  
597 in Cape Town, South Africa: A Cross-sectional Study. *PLOS Medicine.* 2012;9(8):e1001281.  
598 doi: 10.1371/journal.pmed.1001281.
- 599 12. Sekandi JN, Dobbin K, Oloya J, Okwera A, Whalen CC, Corso PS. Cost-effectiveness  
600 analysis of community active case finding and household contact investigation for  
601 tuberculosis case detection in urban Africa. *PLoS One.* 2015;10(2):e0117009-e. doi:  
602 10.1371/journal.pone.0117009. PubMed PMID: 25658592.
- 603 13. Qin H, Liang X, Zhou L, Lan Y, Lin M, Zhang Z, et al. Analysis on the effect of  
604 GeneXpert MTB/RIF single test and mixed test on sputum samples for actively screening

- 605 tuberculosis in key population of Guangxi. Chinese Journal of Antituberculosis.  
606 2023;45(9):880-4.
- 607 14. Bennett S, Woods T, Liyanage WM, Smith DL. A simplified general method for  
608 cluster-sample surveys of health in developing countries. World Health Stat Q.  
609 1991;44(3):98-106. PubMed PMID: 1949887.
- 610 15. National Bureau of Statistics. The seventh national population census. 2021.
- 611 16. Hothorn T, Everitt BS. A Handbook of Statistical Analyses Using R. 1st ed. ed. New  
612 York: Chapman and Hall/CRC; 2006.
- 613 17. National Health and Family Planning Commission of China. Classification of  
614 tuberculosis. 2017.
- 615 18. National Health and Family Planning Commission of China. Diagnosis for pulmonary  
616 tuberculosis. 2017.
- 617 19. Campbell MK, Piaggio G, Elbourne DR, Altman DG. Consort 2010 statement:  
618 extension to cluster randomised trials. BMJ : British Medical Journal. 2012;345:e5661. doi:  
619 10.1136/bmj.e5661.
- 620 20. Campbell M, Fitzpatrick R, Haines A, Kinmonth AL, Sandercock P, Spiegelhalter D, et  
621 al. Framework for design and evaluation of complex interventions to improve health. BMJ.  
622 2000;321(7262):694-6. doi: 10.1136/bmj.321.7262.694. PubMed PMID: 10987780.
- 623 21. Grant A, Treweek S, Dreischulte T, Foy R, Guthrie B. Process evaluations for cluster-  
624 randomised trials of complex interventions: a proposed framework for design and reporting.  
625 Trials. 2013;14(1):15. doi: 10.1186/1745-6215-14-15.
- 626 22. Oakley A, Strange V, Bonell C, Allen E, Stephenson J, Team RS. Process evaluation in  
627 randomised controlled trials of complex interventions. BMJ. 2006;332(7538):413-6. doi:  
628 10.1136/bmj.332.7538.413. PubMed PMID: 16484270.

- 629 23. Gale NK, Heath G, Cameron E, Rashid S, Redwood S. Using the framework method  
630 for the analysis of qualitative data in multi-disciplinary health research. BMC Medical  
631 Research Methodology. 2013;13(1):117. doi: 10.1186/1471-2288-13-117.
- 632 24. Tong A, Sainsbury P, Craig J. Consolidated criteria for reporting qualitative research  
633 (COREQ): a 32-item checklist for interviews and focus groups. International Journal for  
634 Quality in Health Care. 2007;19(6):349-57. doi: 10.1093/intqhc/mzm042.
- 635 25. Hayes RJ, Moulton LH. Cluster Randomised Trials. 2nd ed. ed: Chapman and  
636 Hall/CRC; 2017.
- 637 26. Zhang C, Wang L-x, Zhang H, Cheng J. Cost-effective study of different strategies for  
638 pulmonary tuberculosis case finding in elderly people. Chinese Journal of Antituberculosis.  
639 2013;35(10):794-8.
- 640 27. Technical Guidance Group of the Fifth National TB Epidemiological Survey, The Office  
641 of the Fifth National TB Epidemiological Survey. The fifth national tuberculosis  
642 epidemiological survey in 2010. Chinese Journal of Antituberculosis. 2012;34(8):485-508.
- 643 28. Qin ZZ, Ahmed S, Sarker MS, Paul K, Adel ASS, Naheyant T, et al. Tuberculosis  
644 detection from chest x-rays for triaging in a high tuberculosis-burden setting: an evaluation  
645 of five artificial intelligence algorithms. Lancet Digit Health. 2021;3(9):e543-e54. doi:  
646 10.1016/s2589-7500(21)00116-3. PubMed PMID: 34446265.

647

## 648 **Supporting information**

649 S1 Table SPIRIT checklist

|                                               | STUDY PERIOD |      |       |       |       |
|-----------------------------------------------|--------------|------|-------|-------|-------|
| Year                                          |              | 1    | 2     | 3     |       |
| Month                                         | 1-3          | 4-15 | 16-27 | 28-39 | 40-42 |
| <b>Preparation</b>                            |              |      |       |       |       |
| Study design                                  |              |      |       |       |       |
| Research tools development                    |              |      |       |       |       |
| <b>Interventions</b>                          |              |      |       |       |       |
| Enrollment                                    |              |      |       |       |       |
| Intervention                                  |              |      |       |       |       |
| Control                                       |              |      |       |       |       |
| <b>Cleaning Period</b>                        |              |      |       |       |       |
| <b>Evaluation</b>                             |              |      |       |       |       |
| Epidemiological survey                        |              |      |       |       |       |
| Trial data collection                         |              |      |       |       |       |
| Process evaluation                            |              |      |       |       |       |
| Economic evaluation                           |              |      |       |       |       |
| <b>Data analysis and result dissemination</b> |              |      |       |       |       |

Fig 1

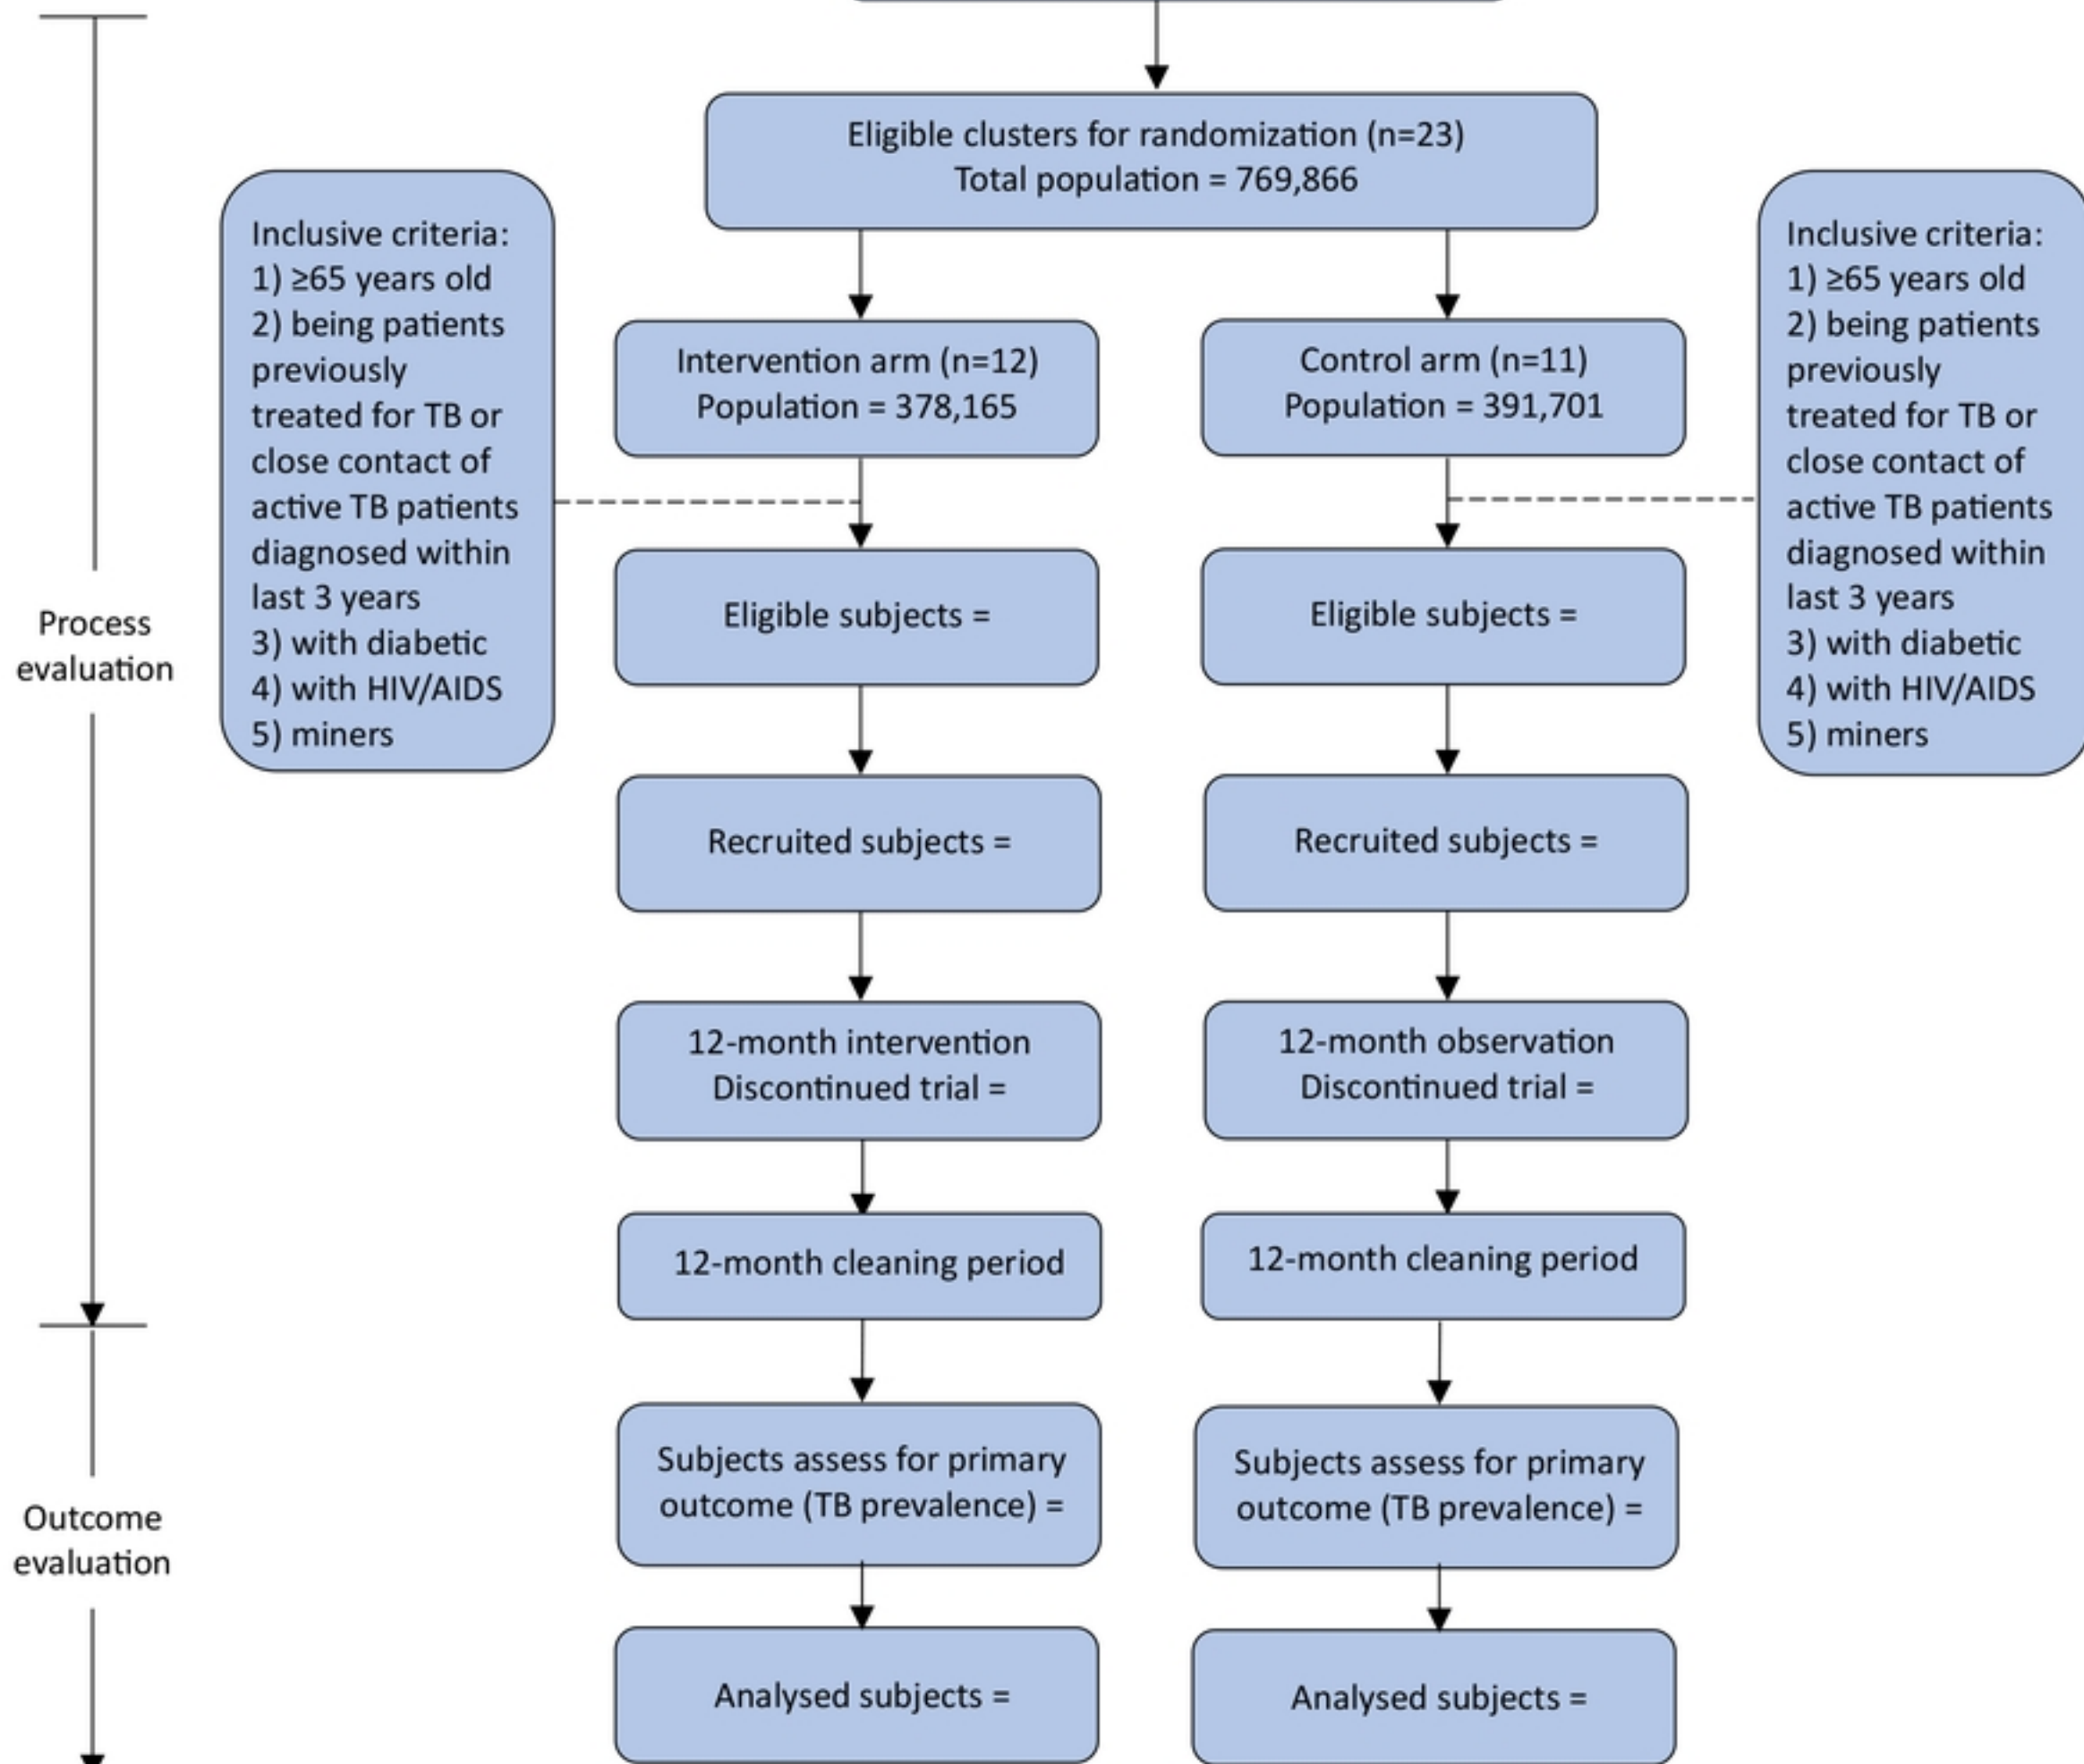

Fig 2



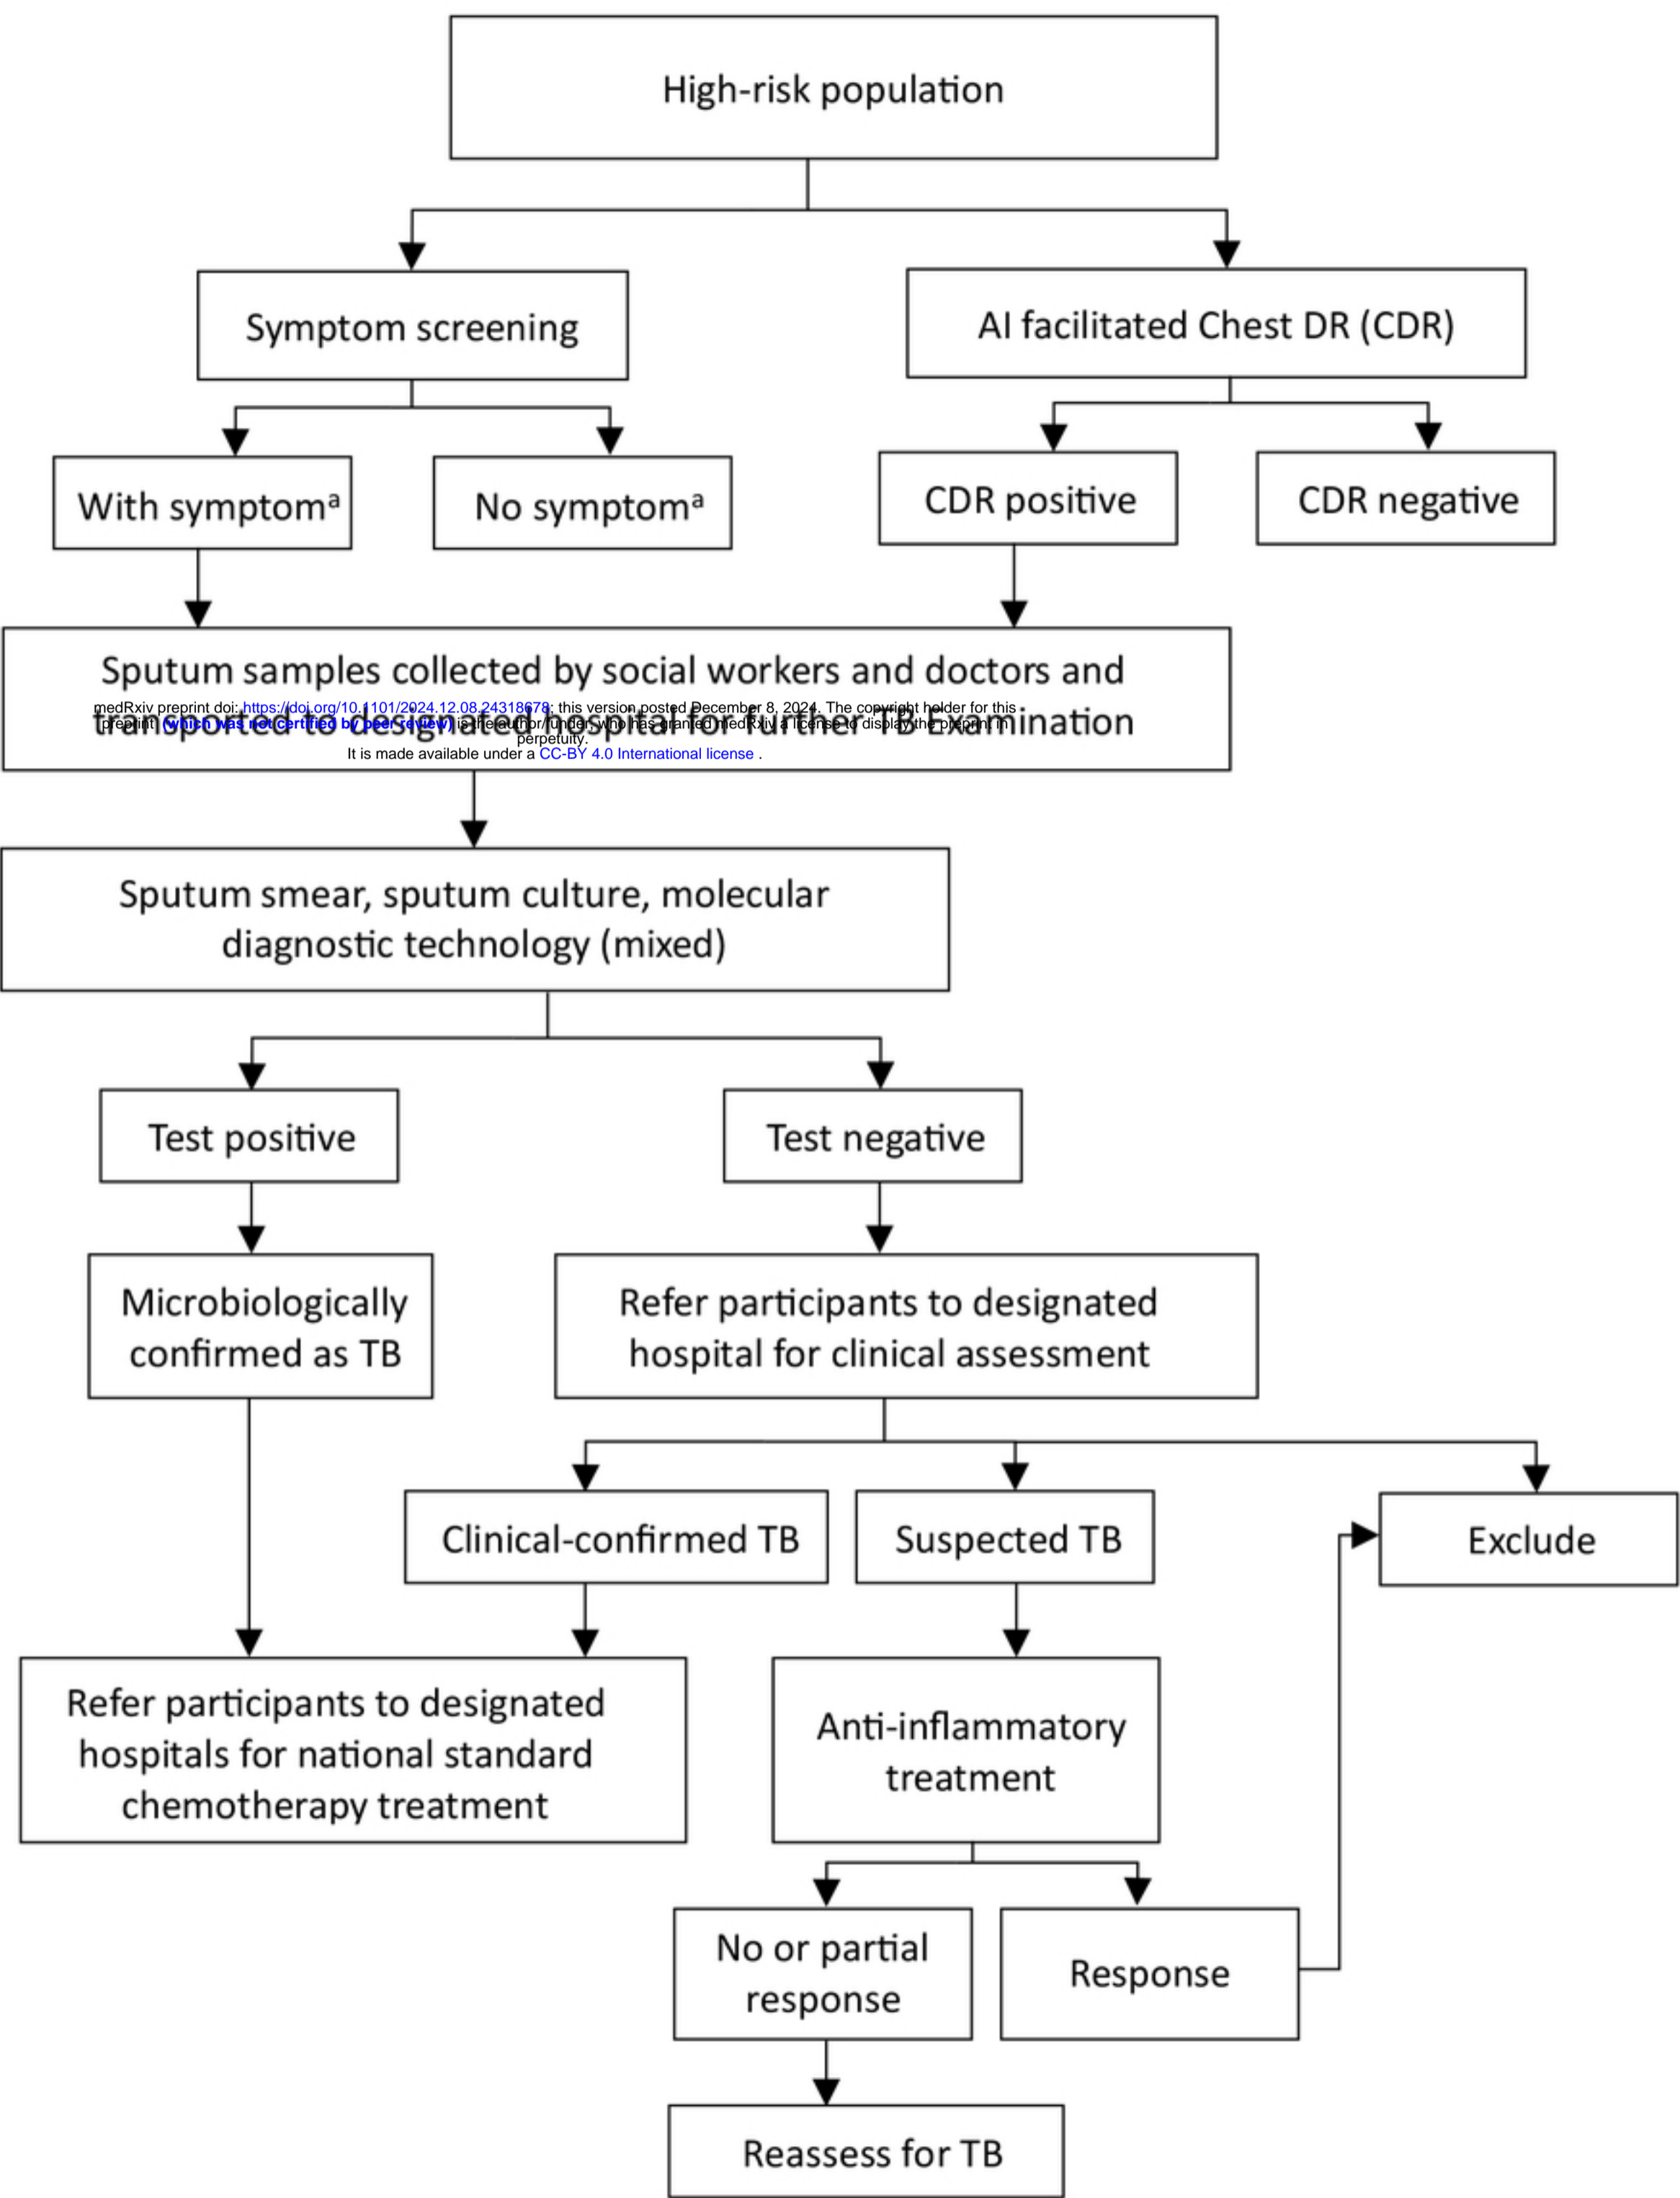

Fig 3
